# Supplementary material for: Associations between radiologist-defined semantic and automatically computed radiomic features in non-small cell lung cancer
Source: PubMed Central journal article supplement (PMC5471260; doi:10.1038/s41598-017-02425-5), 2017-06-14
Supplement: 41598_2017_2425_MOESM1_ESM.pdf [file 41598_2017_2425_MOESM1_ESM.pdf]

## **Associations between radiologist-defined semantic and automatically computed radiomic features in non-small cell lung cancer**

**Stephen SF Yip<sup>1\*</sup>, Ying Liu<sup>2\*</sup>, Chintan Parmar<sup>1</sup>, Qian Li<sup>2</sup>, Shichang Liu<sup>2</sup>, Fangyuan Qu<sup>2</sup>, Zhaoxiang Ye<sup>2</sup>, Robert J. Gillies<sup>3-4</sup>, and Hugo J.W.L. Aerts<sup>1,5</sup>**

*<sup>1</sup>Department of Radiation Oncology, Dana-Farber Cancer Institute, Brigham and Women's Hospital, and Harvard Medical School, Boston, MA 02115, U.S.A. <sup>2</sup>Department of Radiology, Tianjin Medical University Cancer Institute and Hospital, National Clinical Research Center, Key Laboratory of Cancer Prevention and Therapy, Tianjin, PR China <sup>3</sup>Department of Cancer Imaging and Metabolism, H. Lee Moffitt Cancer Center and Research Institute, Tampa, FL, U.S.A.; <sup>4</sup>Department of Radiology, H. Lee Moffitt Cancer Center and Research Institute, Tampa, FL., U.S.A. <sup>5</sup>Department of Radiology, Brigham and Women's Hospital and Harvard Medical School, Boston, MA 02115, U.S.A.*

\*These authors contribute equally

### **Corresponding author:**

Stephen S.F. Yip, Ph.D.  
Department of Radiation Oncology  
Division of Medical Physics and Biophysics  
Dana-Farber Cancer Institute and Harvard Medical School  
Harvard Institutes of Medicine (HIM) building  
3rd Floor – Suite 348  
77 Avenue Louis Pasteur  
Boston, MA 02115  
312 804 1048 (cell)  
[Stephen\\_Yip@dfci.harvard.edu](mailto:Stephen_Yip@dfci.harvard.edu)

**Cavitation**

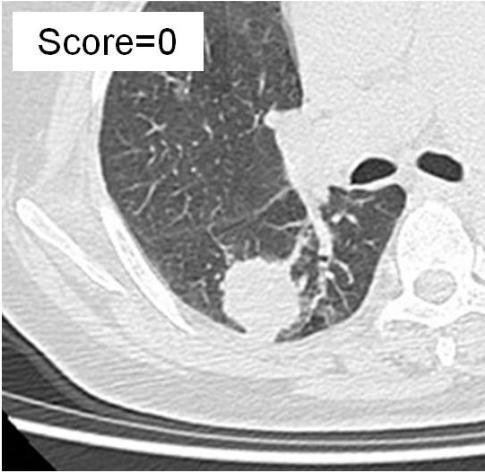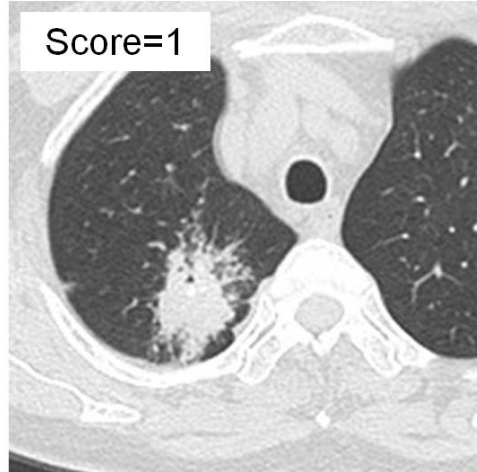

**Air Bronchogram**

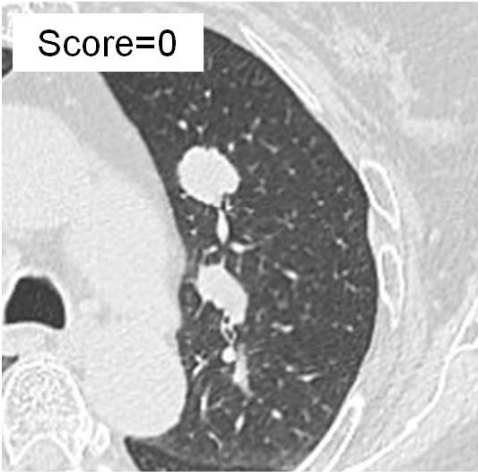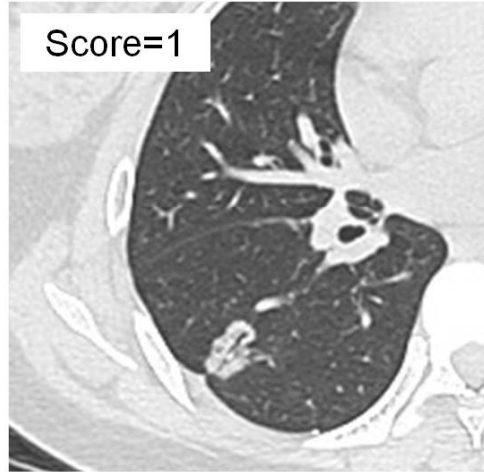

**Calcification**

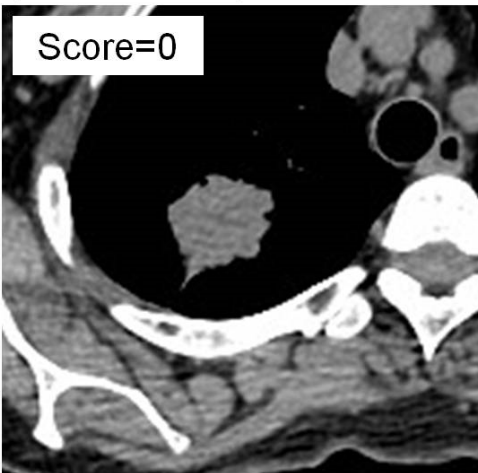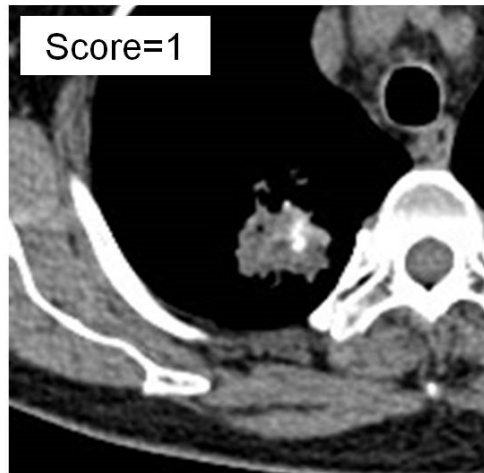

Supplementary Figure S1. Visual examples of binary semantic features

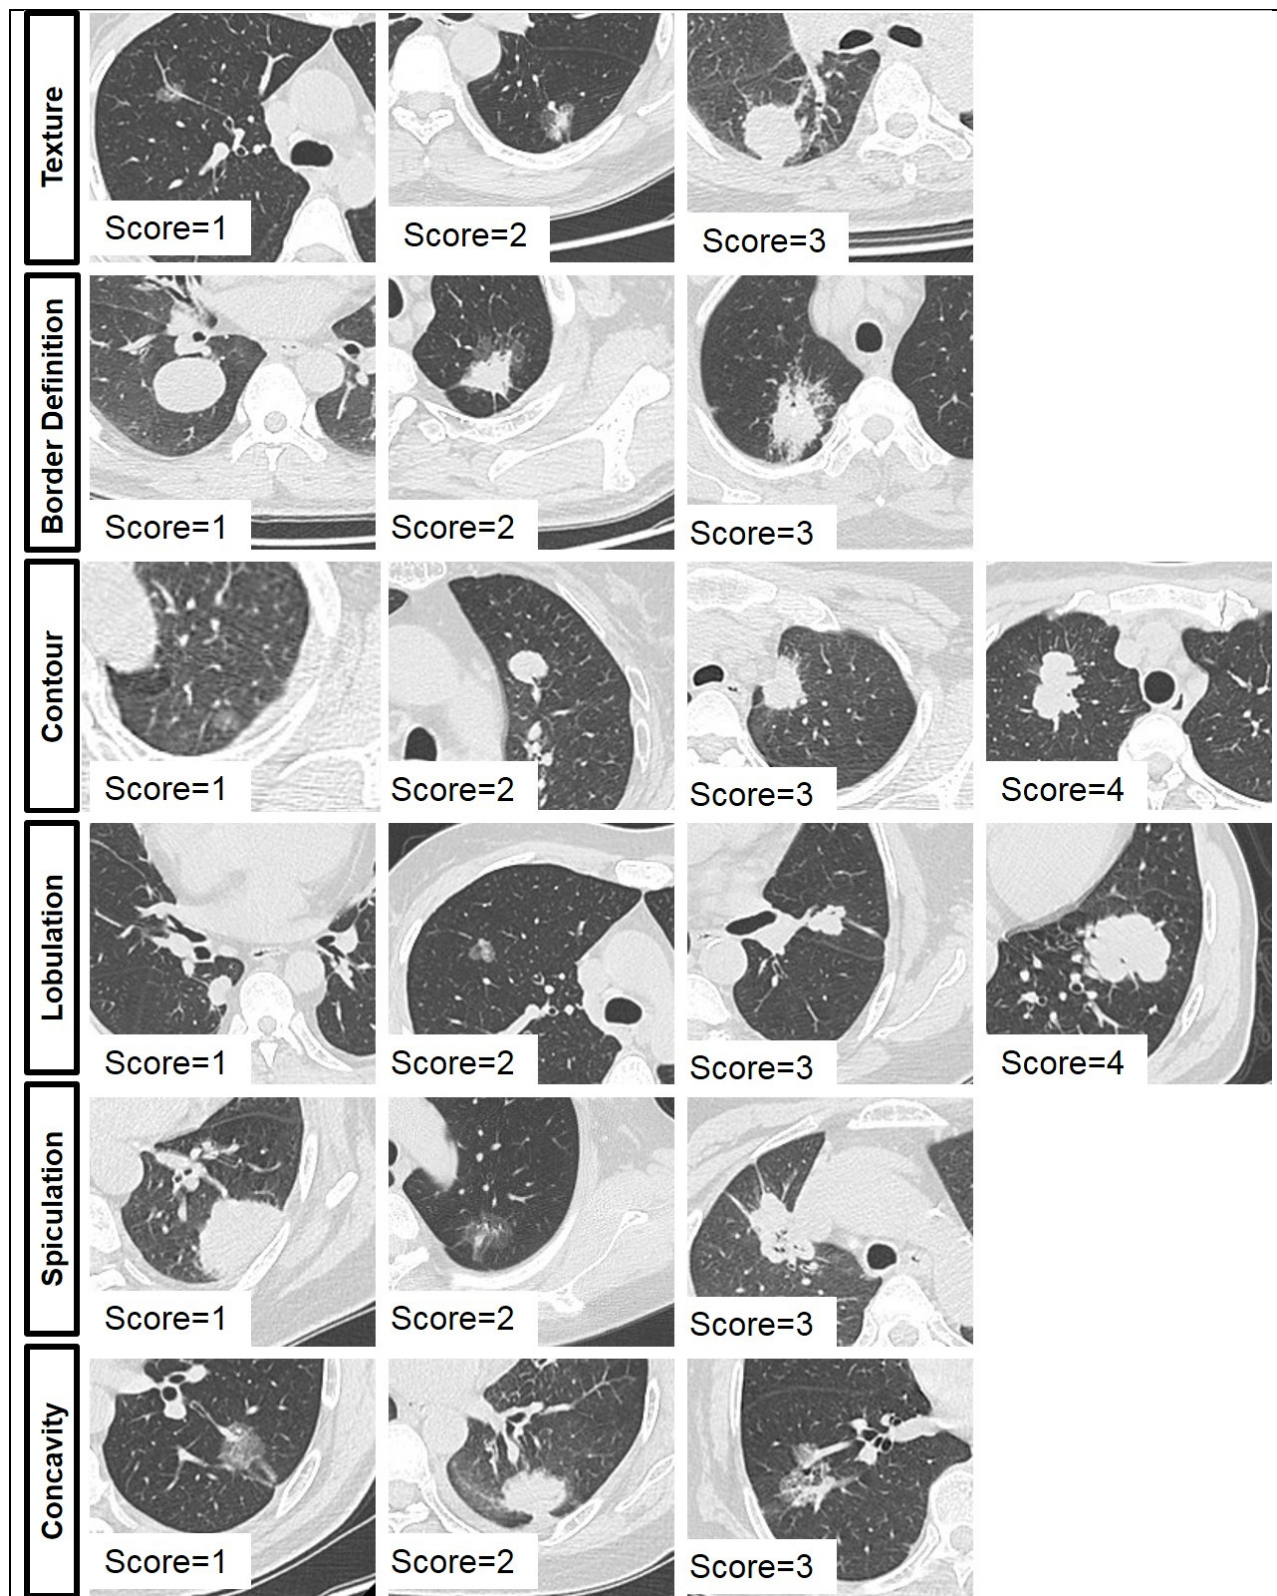

Supplementary Figure 2. Visual examples of categorical semantic features

| Radiomic Feature Group                                                                           | Radiomic feature              | Description                                                                                                                                                      |
|--------------------------------------------------------------------------------------------------|-------------------------------|------------------------------------------------------------------------------------------------------------------------------------------------------------------|
| <b>Shape</b>                                                                                     |                               |                                                                                                                                                                  |
|                                                                                                  | Volume                        | Number of tumor voxels multiplied by the CT voxel volume                                                                                                         |
|                                                                                                  | Sphericity                    | Roundness of the tumor                                                                                                                                           |
| <b>Statistics</b>                                                                                |                               |                                                                                                                                                                  |
|                                                                                                  | Median                        | Median value of the tumor Hounsfield unit (HU)                                                                                                                   |
|                                                                                                  | Kurtosis                      | Measures the flatness of the tumor Hounsfield unit (HU) distribution (or how heavy-tailed or light tailed the distribution is) relative to a normal distribution |
|                                                                                                  | Skewness                      | Measures the degree of asymmetry of the tumor HU distribution                                                                                                    |
| <b>Gray level co-occurrence matrix (GLCM)</b>                                                    |                               |                                                                                                                                                                  |
|                                                                                                  | Cluster Shade (clusShade)     | Measures the asymmetric pattern within the tumor. High cluster shade value indicates great asymmetry                                                             |
|                                                                                                  | Cluster Prominence (clusProm) | Measures the variation in Hounsfield unit (HU) within the tumor                                                                                                  |
|                                                                                                  | Energy                        | Measures tumor homogeneity                                                                                                                                       |
|                                                                                                  | Sum Entropy                   | Measures tumor heterogeneity                                                                                                                                     |
| <b>Gray level size zone matrix (GLSZM)</b>                                                       |                               |                                                                                                                                                                  |
|                                                                                                  | Size zone variability         | Measures the similarity of the zones throughout the tumor; where a zone is a 3D volume with similar intensity value (HU).                                        |
| Supplementary Table S1. Description of the radiomic features that were included in the analysis. |                               |                                                                                                                                                                  |

|                                                   | Cavitation | Air.bronchogram | Calcification |
|---------------------------------------------------|------------|-----------------|---------------|
| GLCM_clusProm                                     | 0.76       | 0.64            | 0.45          |
| GLCM_clusShade                                    | 0.27       | 0.40            | 0.53          |
| GLCM_energy                                       | 0.39       | 0.41            | 0.53          |
| GLCM_sumEntro                                     | 0.73       | 0.64            | 0.42          |
| GLSZM_sizeZoneVariability                         | 0.67       | 0.62            | 0.51          |
| Shape_sphericity                                  | 0.41       | 0.40            | 0.51          |
| Stats_kurtosis                                    | 0.40       | 0.46            | 0.68          |
| Stats_median                                      | 0.38       | 0.41            | 0.64          |
| Stats_skewness                                    | 0.47       | 0.47            | 0.37          |
| Shape_volume                                      | 0.44       | 0.48            | 0.59          |
| LoG_sigma_3_mm_3D_glcM_clusShade                  | 0.29       | 0.39            | 0.64          |
| LoG_sigma_3_mm_3D_glcM_clusTend                   | 0.64       | 0.59            | 0.46          |
| LoG_sigma_3_mm_3D_glcM_correl1                    | 0.29       | 0.35            | 0.60          |
| LoG_sigma_3_mm_3D_glcM_invDiffnorm                | 0.48       | 0.50            | 0.58          |
| LoG_sigma_3_mm_3D_glcM_inverseVar                 | 0.33       | 0.35            | 0.61          |
| LoG_sigma_3_mm_3D_glcM_sumEntro                   | 0.53       | 0.55            | 0.56          |
| LoG_sigma_3_mm_3D_glszm_highIntensityLarteAreaEmp | 0.53       | 0.54            | 0.51          |
| LoG_sigma_3_mm_3D_glszm_largeAreaEmphasis         | 0.33       | 0.40            | 0.57          |
| LoG_sigma_3_mm_3D_glszm_lowIntensitySmallAreaEmp  | 0.41       | 0.46            | 0.43          |
| LoG_sigma_3_mm_3D_glszm_sizeZoneVariability       | 0.72       | 0.63            | 0.48          |
| LoG_sigma_3_mm_3D_stats_mean                      | 0.49       | 0.52            | 0.52          |
| LoG_sigma_3_mm_3D_stats_uniformity                | 0.41       | 0.40            | 0.47          |
| LoG_sigma_3_mm_3D_stats_uniformityPos             | 0.47       | 0.43            | 0.40          |
| Wavelet_HHH_glcM_correl1                          | 0.46       | 0.46            | 0.49          |
| Wavelet_HHH_glcM_maxProb                          | 0.33       | 0.39            | 0.48          |
| Wavelet_HHH_glszm_lowIntensitySmallAreaEmp        | 0.35       | 0.38            | 0.48          |
| Wavelet_HHH_glszm_sizeZoneVariability             | 0.65       | 0.61            | 0.51          |
| Wavelet_HHH_stats_range                           | 0.55       | 0.54            | 0.55          |
| Wavelet_HHH_stats_std                             | 0.65       | 0.60            | 0.46          |
| Wavelet_HHL_glcM_inverseVar                       | 0.25       | 0.34            | 0.59          |
| Wavelet_HHL_stats_kurtosis                        | 0.38       | 0.41            | 0.59          |
| Wavelet_HHL_stats_min                             | 0.48       | 0.55            | 0.45          |
| Wavelet_HLH_glszm_lowIntensitySmallAreaEmp        | 0.32       | 0.42            | 0.48          |
| Wavelet_HLH_stats_kurtosis                        | 0.38       | 0.45            | 0.58          |
| Wavelet_HLH_stats_min                             | 0.48       | 0.49            | 0.45          |
| Wavelet_HLL_stats_min                             | 0.47       | 0.47            | 0.39          |
| Wavelet_HLL_stats_range                           | 0.49       | 0.51            | 0.62          |
| Wavelet_HLL_stats_var                             | 0.57       | 0.58            | 0.49          |
| Wavelet_LHH_stats_kurtosis                        | 0.39       | 0.43            | 0.61          |
| Wavelet_LHH_stats_md                              | 0.66       | 0.55            | 0.41          |
| Wavelet_LHL_glszm_zonePercentage                  | 0.73       | 0.64            | 0.38          |
| Wavelet_LHL_stats_kurtosis                        | 0.37       | 0.41            | 0.56          |
| Wavelet_LHL_stats_mean                            | 0.55       | 0.46            | 0.43          |
| Wavelet_LHL_stats_var                             | 0.60       | 0.52            | 0.45          |
| Wavelet_LLH_glszm_lowIntensityEmphasis            | 0.34       | 0.37            | 0.47          |
| Wavelet_LLH_glszm_sizeZoneVariability             | 0.71       | 0.62            | 0.51          |
| Wavelet_LLH_stats_kurtosis                        | 0.38       | 0.44            | 0.63          |
| Wavelet_LLH_stats_max                             | 0.51       | 0.45            | 0.57          |
| Wavelet_LLH_stats_mean                            | 0.59       | 0.49            | 0.41          |
| Wavelet_LLL_glcM_correl1                          | 0.65       | 0.59            | 0.49          |
| Wavelet_LLL_glcM_maxProb                          | 0.32       | 0.34            | 0.51          |
| Wavelet_LLL_stats_kurtosis                        | 0.39       | 0.42            | 0.58          |
| Wavelet_LLL_stats_max                             | 0.42       | 0.41            | 0.66          |
| Wavelet_LLL_stats_min                             | 0.31       | 0.40            | 0.57          |
| Wavelet_LLL_stats_range                           | 0.66       | 0.59            | 0.53          |
| Wavelet_LLL_stats_totalenergy                     | 0.62       | 0.56            | 0.50          |
| Wavelet_LLL_stats_var                             | 0.68       | 0.61            | 0.45          |

Supplementary Table S2. AUC values for the associations between the binary semantic and radiomic features

|                                                   | <b>Cavitation</b> | <b>Air.bronchogram</b> | <b>Calcification</b> |
|---------------------------------------------------|-------------------|------------------------|----------------------|
| GLCM_clusProm                                     | 1.00E-17          | 1.40E-04               | 0.2886               |
| GLCM_clusShade                                    | 1.04E-13          | 1.04E-02               | 0.5903               |
| GLCM_energy                                       | 3.88E-03          | 1.51E-02               | 0.5803               |
| GLCM_sumEntro                                     | 1.37E-12          | 3.31E-05               | 0.1150               |
| GLSZM_sizeZoneVariability                         | 5.57E-07          | 1.20E-03               | 0.8207               |
| Shape_sphericity                                  | 2.21E-02          | 1.03E-02               | 0.9100               |
| Stats_kurtosis                                    | 6.50E-03          | 2.56E-01               | 0.0011               |
| Stats_median                                      | 1.24E-03          | 8.83E-03               | 0.0053               |
| Stats_skewness                                    | 4.23E-01          | 4.23E-01               | 0.0870               |
| Shape_volume                                      | 1.79E-01          | 5.14E-01               | 0.1786               |
| LoG_sigma_3_mm_3D_glcm_clusShade                  | 2.54E-11          | 3.20E-03               | 0.0041               |
| LoG_sigma_3_mm_3D_glcm_clusTend                   | 1.26E-04          | 1.32E-02               | 0.4092               |
| LoG_sigma_3_mm_3D_glcm_correl1                    | 7.79E-10          | 7.19E-06               | 0.0469               |
| LoG_sigma_3_mm_3D_glcm_invDiffnorm                | 8.50E-01          | 9.09E-01               | 0.4980               |
| LoG_sigma_3_mm_3D_glcm_inverseVar                 | 7.01E-07          | 1.98E-05               | 0.0261               |
| LoG_sigma_3_mm_3D_glcm_sumEntro                   | 4.50E-01          | 3.21E-01               | 0.3210               |
| LoG_sigma_3_mm_3D_glszm_highIntensityLarteAreaEmp | 5.40E-01          | 5.40E-01               | 0.9189               |
| LoG_sigma_3_mm_3D_glszm_largeAreaEmphasis         | 3.25E-06          | 9.55E-03               | 0.2167               |
| LoG_sigma_3_mm_3D_glszm_lowIntensitySmallAreaEmp  | 4.66E-02          | 2.76E-01               | 0.2756               |
| LoG_sigma_3_mm_3D_glszm_sizeZoneVariability       | 6.99E-12          | 1.56E-04               | 0.7488               |
| LoG_sigma_3_mm_3D_stats_mean                      | 7.57E-01          | 7.57E-01               | 0.7571               |
| LoG_sigma_3_mm_3D_stats_uniformity                | 1.69E-02          | 1.69E-02               | 0.5637               |
| LoG_sigma_3_mm_3D_stats_uniformityPos             | 4.29E-01          | 6.94E-02               | 0.0694               |
| Wavelet_HHH_glcm_correl1                          | 4.16E-01          | 4.16E-01               | 0.8263               |
| Wavelet_HHH_glcm_maxProb                          | 1.91E-06          | 1.74E-03               | 0.7178               |
| Wavelet_HHH_glszm_lowIntensitySmallAreaEmp        | 5.57E-05          | 9.10E-04               | 0.7682               |
| Wavelet_HHH_glszm_sizeZoneVariability             | 6.03E-05          | 1.57E-03               | 0.8495               |
| Wavelet_HHH_stats_range                           | 3.13E-01          | 3.13E-01               | 0.3128               |
| Wavelet_HHH_stats_std                             | 3.51E-05          | 8.96E-03               | 0.4592               |
| Wavelet_HHL_glcm_inverseVar                       | 7.38E-15          | 2.55E-06               | 0.0766               |
| Wavelet_HHL_stats_kurtosis                        | 3.37E-03          | 1.37E-02               | 0.1093               |
| Wavelet_HHL_stats_min                             | 6.12E-01          | 3.80E-01               | 0.5945               |
| Wavelet_HLH_glszm_lowIntensitySmallAreaEmp        | 1.07E-07          | 5.12E-02               | 0.6609               |
| Wavelet_HLH_stats_kurtosis                        | 1.59E-03          | 1.56E-01               | 0.1559               |
| Wavelet_HLH_stats_min                             | 6.79E-01          | 6.79E-01               | 0.6785               |
| Wavelet_HLL_stats_min                             | 4.05E-01          | 4.05E-01               | 0.0860               |
| Wavelet_HLL_stats_range                           | 8.44E-01          | 8.44E-01               | 0.0375               |
| Wavelet_HLL_stats_var                             | 9.18E-02          | 9.18E-02               | 0.9297               |
| Wavelet_LHH_stats_kurtosis                        | 8.85E-03          | 4.97E-02               | 0.0497               |
| Wavelet_LHH_stats_md                              | 8.02E-06          | 1.29E-01               | 0.1137               |
| Wavelet_LHL_glszm_zonePercentage                  | 2.71E-12          | 5.93E-05               | 0.0118               |
| Wavelet_LHL_stats_kurtosis                        | 8.98E-04          | 1.04E-02               | 0.2764               |
| Wavelet_LHL_stats_mean                            | 2.11E-01          | 2.37E-01               | 0.2108               |
| Wavelet_LHL_stats_var                             | 1.30E-02          | 5.81E-01               | 0.4448               |
| Wavelet_LLH_glszm_lowIntensityEmphasis            | 2.37E-06          | 2.38E-04               | 0.5797               |
| Wavelet_LLH_glszm_sizeZoneVariability             | 2.44E-10          | 8.77E-04               | 0.8284               |
| Wavelet_LLH_stats_kurtosis                        | 2.43E-03          | 8.17E-02               | 0.0119               |
| Wavelet_LLH_stats_max                             | 8.43E-01          | 1.97E-01               | 0.1965               |
| Wavelet_LLH_stats_mean                            | 4.65E-02          | 7.70E-01               | 0.1471               |
| Wavelet_LLL_glcm_correl1                          | 1.37E-05          | 2.26E-02               | 0.7602               |
| Wavelet_LLL_glcm_maxProb                          | 2.07E-07          | 2.14E-06               | 0.8333               |
| Wavelet_LLL_stats_kurtosis                        | 6.41E-03          | 2.85E-02               | 0.1740               |
| Wavelet_LLL_stats_max                             | 3.21E-02          | 1.27E-02               | 0.0005               |
| Wavelet_LLL_stats_min                             | 1.79E-08          | 8.26E-03               | 0.1246               |
| Wavelet_LLL_stats_range                           | 6.91E-06          | 1.86E-02               | 0.4979               |
| Wavelet_LLL_stats_totalenergy                     | 2.33E-03          | 1.78E-01               | 0.9798               |
| Wavelet_LLL_stats_var                             | 2.08E-07          | 2.50E-03               | 0.3554               |

Supplementary Table S3. False positive rate corrected p-value (q-value). q-value<0.05 indicates that AUC significantly different from random (AUC=0.50)

|                                                   | Texture | Border.definition | Contour | Lobulation | Spiculation |
|---------------------------------------------------|---------|-------------------|---------|------------|-------------|
| GLCM_clusProm                                     | -0.56   | 0.32              | 0.23    | -0.08      | -0.03       |
| GLCM_clusShade                                    | 0.24    | -0.33             | -0.26   | -0.03      | -0.02       |
| GLCM_energy                                       | 0.16    | -0.28             | -0.30   | -0.14      | -0.06       |
| GLCM_sumEntro                                     | -0.45   | 0.34              | 0.30    | 0.03       | 0.00        |
| GLSZM_sizeZoneVariability                         | -0.35   | 0.31              | 0.29    | 0.09       | 0.05        |
| Shape_sphericity                                  | 0.07    | -0.42             | -0.57   | -0.32      | -0.20       |
| Stats_kurtosis                                    | 0.54    | -0.11             | 0.02    | 0.28       | 0.15        |
| Stats_median                                      | 0.65    | -0.20             | -0.10   | 0.22       | 0.19        |
| Stats_skewness                                    | -0.29   | -0.07             | -0.12   | -0.16      | -0.14       |
| Shape_volume                                      | 0.23    | 0.09              | 0.25    | 0.38       | 0.11        |
| LoG_sigma_3_mm_3D_glc_m_clusShade                 | 0.26    | -0.23             | -0.05   | 0.16       | 0.02        |
| LoG_sigma_3_mm_3D_glc_m_clusTend                  | -0.37   | 0.24              | 0.23    | 0.10       | -0.01       |
| LoG_sigma_3_mm_3D_glc_m_correl1                   | 0.52    | -0.16             | 0.01    | 0.31       | 0.10        |
| LoG_sigma_3_mm_3D_glc_m_invDiffnorm               | 0.34    | 0.08              | 0.17    | 0.30       | 0.10        |
| LoG_sigma_3_mm_3D_glc_m_inverseVar                | 0.56    | -0.17             | -0.07   | 0.16       | 0.04        |
| LoG_sigma_3_mm_3D_glc_m_sumEntro                  | 0.03    | 0.21              | 0.36    | 0.37       | 0.16        |
| LoG_sigma_3_mm_3D_glszm_highIntensityLarteAreaEmp | 0.14    | 0.14              | 0.19    | 0.28       | 0.04        |
| LoG_sigma_3_mm_3D_glszm_largeAreaEmphasis         | 0.48    | -0.13             | 0.00    | 0.28       | 0.07        |
| LoG_sigma_3_mm_3D_glszm_lowIntensitySmallAreaEmp  | 0.00    | -0.19             | -0.25   | -0.22      | -0.12       |
| LoG_sigma_3_mm_3D_glszm_sizeZoneVariability       | -0.38   | 0.35              | 0.27    | 0.06       | 0.03        |
| LoG_sigma_3_mm_3D_stats_mean                      | 0.13    | -0.09             | -0.06   | -0.06      | 0.08        |
| LoG_sigma_3_mm_3D_stats_uniformity                | 0.21    | -0.26             | -0.34   | -0.27      | -0.11       |
| LoG_sigma_3_mm_3D_stats_uniformityPos             | -0.03   | -0.17             | -0.29   | -0.34      | -0.21       |
| Wavelet_HHH_glc_m_correl1                         | -0.01   | -0.01             | -0.02   | -0.01      | 0.07        |
| Wavelet_HHH_glc_m_maxProb                         | 0.16    | -0.27             | -0.32   | -0.13      | -0.07       |
| Wavelet_HHH_glszm_lowIntensitySmallAreaEmp        | 0.23    | -0.27             | -0.28   | -0.11      | -0.02       |
| Wavelet_HHH_glszm_sizeZoneVariability             | -0.20   | 0.29              | 0.31    | 0.14       | 0.04        |
| Wavelet_HHH_stats_range                           | 0.00    | 0.25              | 0.29    | 0.26       | 0.19        |
| Wavelet_HHH_stats_std                             | -0.25   | 0.30              | 0.19    | -0.02      | 0.15        |
| Wavelet_HHL_glc_m_inverseVar                      | 0.51    | -0.24             | -0.11   | 0.19       | 0.11        |
| Wavelet_HHL_stats_kurtosis                        | 0.29    | -0.06             | 0.06    | 0.26       | 0.14        |
| Wavelet_HHL_stats_min                             | -0.13   | -0.16             | -0.26   | -0.30      | -0.17       |
| Wavelet_HLH_glszm_lowIntensitySmallAreaEmp        | 0.18    | -0.23             | -0.25   | -0.14      | -0.15       |
| Wavelet_HLH_stats_kurtosis                        | 0.25    | -0.01             | 0.08    | 0.27       | 0.11        |
| Wavelet_HLH_stats_min                             | -0.09   | -0.22             | -0.26   | -0.28      | -0.25       |
| Wavelet_HLL_stats_min                             | 0.04    | -0.16             | -0.28   | -0.19      | -0.12       |
| Wavelet_HLL_stats_range                           | 0.14    | 0.14              | 0.29    | 0.32       | 0.16        |
| Wavelet_HLL_stats_var                             | -0.17   | 0.06              | 0.07    | -0.04      | 0.04        |
| Wavelet_LHH_stats_kurtosis                        | 0.24    | -0.07             | 0.03    | 0.23       | 0.02        |
| Wavelet_LHH_stats_md                              | -0.26   | 0.21              | 0.11    | -0.11      | 0.04        |
| Wavelet_LHL_glszm_zonePercentage                  | -0.54   | 0.27              | 0.08    | -0.26      | -0.06       |
| Wavelet_LHL_stats_kurtosis                        | 0.37    | -0.18             | 0.02    | 0.28       | 0.04        |
| Wavelet_LHL_stats_mean                            | -0.20   | 0.04              | 0.04    | 0.05       | -0.05       |
| Wavelet_LHL_stats_var                             | -0.09   | 0.05              | 0.03    | -0.04      | -0.05       |
| Wavelet_LLH_glszm_lowIntensityEmphasis            | 0.23    | -0.24             | -0.27   | -0.12      | -0.01       |
| Wavelet_LLH_glszm_sizeZoneVariability             | -0.31   | 0.34              | 0.32    | 0.11       | 0.07        |
| Wavelet_LLH_stats_kurtosis                        | 0.35    | -0.10             | 0.07    | 0.30       | 0.03        |
| Wavelet_LLH_stats_max                             | 0.20    | 0.01              | 0.15    | 0.27       | 0.00        |
| Wavelet_LLH_stats_mean                            | -0.27   | 0.09              | 0.02    | 0.05       | -0.17       |
| Wavelet_LLL_glc_m_correl1                         | -0.37   | 0.35              | 0.31    | 0.03       | 0.05        |
| Wavelet_LLL_glc_m_maxProb                         | 0.22    | -0.31             | -0.32   | -0.05      | -0.08       |
| Wavelet_LLL_stats_kurtosis                        | 0.37    | -0.09             | -0.01   | 0.29       | 0.01        |
| Wavelet_LLL_stats_max                             | 0.47    | -0.02             | 0.10    | 0.26       | 0.14        |
| Wavelet_LLL_stats_min                             | 0.59    | -0.21             | -0.22   | 0.02       | 0.08        |
| Wavelet_LLL_stats_range                           | -0.25   | 0.20              | 0.29    | 0.17       | 0.02        |
| Wavelet_LLL_stats_totalenergy                     | -0.42   | 0.25              | 0.31    | 0.16       | -0.03       |
| Wavelet_LLL_stats_var                             | -0.44   | 0.22              | 0.17    | -0.11      | 0.01        |

Supplementary Table S4. Associations between the categorical semantic and radiomic features assessed with Spearman coefficient

|                                                   | Texture  | Border.definition | Contour  | Lobulation | Spiculation |
|---------------------------------------------------|----------|-------------------|----------|------------|-------------|
| GLCM_clusProm                                     | 4.01E-17 | 1.23E-05          | 1.93E-03 | 4.56E-01   | 0.7586      |
| GLCM_clusShade                                    | 1.50E-06 | 6.61E-06          | 4.35E-04 | 3.58E-01   | 0.9482      |
| GLCM_energy                                       | 1.19E-04 | 1.47E-04          | 1.39E-04 | 9.34E-02   | 0.1292      |
| GLCM_sumEntro                                     | 5.50E-15 | 4.84E-06          | 1.83E-04 | 2.66E-01   | 0.9996      |
| GLSZM_sizeZoneVariability                         | 4.14E-08 | 1.14E-05          | 2.23E-04 | 4.10E-01   | 0.5906      |
| Shape_sphericity                                  | 1.24E-02 | 7.67E-09          | 3.36E-16 | 2.45E-05   | 0.0127      |
| Stats_kurtosis                                    | 9.43E-16 | 1.69E-01          | 9.60E-02 | 1.33E-04   | 0.0102      |
| Stats_median                                      | 7.50E-23 | 1.03E-02          | 7.97E-02 | 2.72E-03   | 0.0116      |
| Stats_skewness                                    | 7.72E-06 | 5.54E-01          | 1.87E-01 | 1.12E-01   | 0.0535      |
| Shape_volume                                      | 3.68E-04 | 5.80E-02          | 7.29E-04 | 7.48E-07   | 0.0005      |
| LoG_sigma_3_mm_3D_glcm_clusShade                  | 4.53E-05 | 1.24E-03          | 1.55E-01 | 7.38E-03   | 0.1108      |
| LoG_sigma_3_mm_3D_glcm_clusTend                   | 4.14E-08 | 6.21E-04          | 3.06E-03 | 3.58E-01   | 0.9244      |
| LoG_sigma_3_mm_3D_glcm_correl1                    | 5.81E-15 | 2.54E-02          | 1.55E-01 | 9.72E-06   | 0.0102      |
| LoG_sigma_3_mm_3D_glcm_invDiffnorm                | 2.02E-07 | 3.37E-01          | 9.86E-03 | 7.96E-05   | 0.0014      |
| LoG_sigma_3_mm_3D_glcm_inverseVar                 | 3.99E-17 | 3.50E-02          | 1.10E-01 | 4.61E-02   | 0.1056      |
| LoG_sigma_3_mm_3D_glcm_sumEntro                   | 4.34E-02 | 3.41E-03          | 1.07E-05 | 3.95E-06   | 0.0056      |
| LoG_sigma_3_mm_3D_glszm_highIntensityLarteAreaEmp | 3.29E-03 | 4.67E-02          | 1.44E-02 | 5.51E-04   | 0.0123      |
| LoG_sigma_3_mm_3D_glszm_largeAreaEmphasis         | 3.56E-13 | 8.73E-02          | 1.74E-01 | 2.86E-04   | 0.0061      |
| LoG_sigma_3_mm_3D_glszm_lowIntensitySmallAreaEmp  | 1.23E-02 | 9.97E-03          | 4.35E-04 | 1.34E-02   | 0.1572      |
| LoG_sigma_3_mm_3D_glszm_sizeZoneVariability       | 1.55E-09 | 7.82E-07          | 5.40E-04 | 4.32E-01   | 0.4105      |
| LoG_sigma_3_mm_3D_stats_mean                      | 1.12E-01 | 1.14E-01          | 6.67E-01 | 7.38E-03   | 0.0078      |
| LoG_sigma_3_mm_3D_stats_uniformity                | 3.45E-04 | 2.66E-04          | 1.91E-05 | 6.33E-04   | 0.0491      |
| LoG_sigma_3_mm_3D_stats_uniformityPos             | 1.17E-01 | 2.71E-02          | 2.25E-04 | 9.72E-06   | 0.0073      |
| Wavelet_HHH_glcm_correl1                          | 9.44E-01 | 2.04E-02          | 3.02E-01 | 1.03E-01   | 0.5116      |
| Wavelet_HHH_glcm_maxProb                          | 3.34E-04 | 2.66E-04          | 1.01E-04 | 1.90E-01   | 0.5906      |
| Wavelet_HHH_glszm_lowIntensitySmallAreaEmp        | 1.58E-04 | 1.95E-04          | 2.95E-04 | 3.58E-01   | 0.5167      |
| Wavelet_HHH_glszm_sizeZoneVariability             | 9.61E-04 | 4.68E-05          | 1.02E-04 | 1.90E-01   | 0.5700      |
| Wavelet_HHH_stats_range                           | 1.63E-01 | 5.24E-05          | 1.83E-04 | 1.20E-03   | 0.0005      |
| Wavelet_HHH_stats_std                             | 4.34E-04 | 5.28E-05          | 8.68E-04 | 3.58E-01   | 0.0405      |
| Wavelet_HHL_glcm_inverseVar                       | 2.65E-14 | 1.24E-03          | 1.00E-01 | 2.29E-02   | 0.0241      |
| Wavelet_HHL_stats_kurtosis                        | 1.95E-05 | 1.32E-01          | 5.77E-01 | 5.96E-04   | 0.0011      |
| Wavelet_HHL_stats_min                             | 4.74E-02 | 2.66E-03          | 1.58E-03 | 1.95E-04   | 0.0045      |
| Wavelet_HLH_glszm_lowIntensitySmallAreaEmp        | 3.34E-04 | 1.64E-03          | 1.76E-03 | 1.90E-01   | 0.0434      |
| Wavelet_HLH_stats_kurtosis                        | 4.23E-04 | 5.12E-02          | 3.28E-01 | 3.57E-04   | 0.0013      |
| Wavelet_HLH_stats_min                             | 4.67E-02 | 4.07E-04          | 4.35E-04 | 5.96E-04   | 0.0004      |
| Wavelet_HLL_stats_min                             | 6.14E-01 | 3.55E-02          | 3.58E-04 | 1.11E-02   | 0.0513      |
| Wavelet_HLL_stats_range                           | 3.25E-02 | 2.02E-02          | 3.48E-04 | 5.94E-05   | 0.0102      |
| Wavelet_HLL_stats_var                             | 2.66E-02 | 6.14E-01          | 1.52E-01 | 2.06E-01   | 0.1832      |
| Wavelet_LHH_stats_kurtosis                        | 8.95E-04 | 3.87E-01          | 2.76E-01 | 1.54E-04   | 0.0004      |
| Wavelet_LHH_stats_md                              | 2.52E-04 | 5.23E-03          | 3.64E-03 | 1.90E-01   | 0.0405      |
| Wavelet_LHL_glszm_zonePercentage                  | 6.81E-16 | 2.01E-04          | 1.10E-01 | 8.05E-04   | 0.0266      |
| Wavelet_LHL_stats_kurtosis                        | 5.20E-08 | 9.83E-03          | 7.97E-02 | 5.94E-05   | 0.0071      |
| Wavelet_LHL_stats_mean                            | 1.47E-03 | 2.79E-01          | 8.07E-01 | 1.92E-04   | 0.0509      |
| Wavelet_LHL_stats_var                             | 2.42E-01 | 7.26E-01          | 1.00E-01 | 4.32E-01   | 0.0078      |
| Wavelet_LLH_glszm_lowIntensityEmphasis            | 1.20E-04 | 7.32E-04          | 5.40E-04 | 3.58E-01   | 0.4546      |
| Wavelet_LLH_glszm_sizeZoneVariability             | 5.96E-07 | 2.66E-06          | 6.48E-05 | 3.69E-01   | 0.4654      |
| Wavelet_LLH_stats_kurtosis                        | 2.63E-07 | 8.73E-02          | 1.71E-01 | 5.94E-05   | 0.0004      |
| Wavelet_LLH_stats_max                             | 2.66E-03 | 3.44E-01          | 1.71E-01 | 1.54E-04   | 0.0050      |
| Wavelet_LLH_stats_mean                            | 1.20E-04 | 4.55E-02          | 4.61E-01 | 2.46E-03   | 0.0011      |
| Wavelet_LLL_glcm_correl1                          | 5.22E-12 | 2.28E-06          | 1.02E-04 | 5.44E-01   | 0.7266      |
| Wavelet_LLL_glcm_maxProb                          | 2.32E-05 | 2.40E-05          | 5.06E-05 | 2.83E-01   | 0.5210      |
| Wavelet_LLL_stats_kurtosis                        | 6.90E-08 | 2.79E-01          | 6.63E-03 | 7.04E-05   | 0.0321      |
| Wavelet_LLL_stats_max                             | 5.21E-13 | 3.37E-01          | 3.62E-01 | 5.65E-04   | 0.0134      |
| Wavelet_LLL_stats_min                             | 1.80E-18 | 5.41E-03          | 7.08E-03 | 7.38E-01   | 0.4297      |
| Wavelet_LLL_stats_range                           | 9.41E-09 | 4.14E-03          | 1.83E-04 | 7.21E-02   | 0.9482      |
| Wavelet_LLL_stats_totalenergy                     | 2.60E-10 | 1.59E-04          | 1.01E-04 | 1.12E-01   | 0.2139      |
| Wavelet_LLL_stats_var                             | 2.65E-14 | 4.14E-03          | 8.10E-03 | 4.55E-02   | 0.0450      |

Supplementary Table S5. False positive rate corrected p-value (q-value) obtained from Kruskal-Wallis test. q-value<0.05 indicates significant association between semantic and radiomic features
